# Supplementary material for: Plasma Amino Acids and Oxylipins As Potential Multi-Biomarkers for Predicting Diabetic Macular Edema
Source: Research Square preprint supplement (doi:10.21203/rs.3.rs-115691/v1), 2020-12-07

**Plasma amino acids and oxylipins as potential multi-biomarkers for predicting diabetic macular edema**

Sang Youl Rhee1*, Eun Sung Jung2*, Dong Ho Suh3, Su Jin Jeong4, Kiyoung Kim5, Suk Chon1, Seung-Young Yu5, Jeong-Taek Woo1**, Choong Hwan Lee2,3,6**

1Department of Endocrinology and Metabolism, Kyung Hee University School of Medicine, Seoul, Korea

2Department of Systems Biotechnology, Konkuk University, Seoul, Korea

3Department of Bioscience and Biotechnology, Konkuk University, Seoul, Korea

4Statistics Support Department, Kyung Hee University Medical Center Medical Science Research Institute, Seoul, Korea

5Department of Ophthalmology, Kyung Hee University School of Medicine, Seoul, Korea

6Research Institute for Bioactive-Metabolome Network, Konkuk University, Seoul, Korea

**Supplementary Tables**

**Table S1.** Clinical characteristics of subjects after PSM.

| **Category** | **Variables** | **Discovery cohort (30 pairs)** | | | **Extended cohort (43 pairs)** | | |
| --- | --- | --- | --- | --- | --- | --- | --- |
| No ME | ME | *p* | No ME | ME | *p* |
| Clinical characteristics | Gender (female, pair) | 9 | 2 | 1.000 | 16 | 10 | 1.000 |
| DM duration (yr) | 22.10 ± 6.78 | 23.70 ± 6.95 | 0.329 | 21.84 ± 7.27 | 23.81 ± 6.37 | 0.088 |
| Age (yr) | 66.07 ± 8.71 | 61.73 ± 10.51 | 0.068 | 65.02 ± 8.81 | 62.33 ± 10.18 | 0.143 |
| Height (cm) | 159 ± 9.21 | 158.73 ± 8.2 | 0.913 | 159.57 ± 9.21 | 158.63 ± 8.51 | 0.731 |
| Weight (kg) | 61.87 ± 8.8 | 61.91 ± 8.77 | 0.988 | 62.42 ± 9.06 | 61.17 ± 8.84 | 0.456 |
| BMI (kg/m2) | 24.48 ± 2.96 | 24.65 ± 3.7 | 0.834 | 24.49 ± 2.83 | 24.37 ± 3.61 | 0.920 |
| Waist circumference (cm) | 89.04 ± 7.79 | 89.58 ± 11.84 | 0.819 | 88.58 ± 7.41 | 88.27 ± 10.91 | 0.781 |
| Systolic blood pressure (mm Hg) | 123.17 ± 14.05 | 123.6 ± 14.13 | 0.897 | 125.44 ± 13.85 | 124.19 ± 14.41 | 0.515 |
| Diastolic blood pressure (mm Hg) | 69.37 ± 8.04 | 68.43 ± 10.23 | 0.635 | 70.49 ± 8.15 | 68.21 ± 9.89 | 0.235 |
| HbA1c (%) | 8.37 ± 1.92 | 8.35 ± 1.56 | 0.974 | 8.20 ± 1.76 | 8.42 ± 1.45 | 0.586 |
| Fasting plasma glucose (mg/dL) | 166.7 ± 71.48 | 159.93 ± 68.98 | 0.708 | 169.51 ± 81.48 | 166.67 ± 67.11 | 0.976 |
| Total cholesterol (mg/dL) | 178.1 ± 41.35 | 165.5 ± 33.46 | 0.265 | 177.58 ± 38.1 | 163.65 ± 31.72 | 0.169 |
| Triglyceride (mg/dL) | 147.33 ± 111.43 | 154.2 ± 85.01 | 0.782 | 139.49 ± 105.01 | 143.79 ± 79.15 | 0.465 |
| LDL cholesterol (mg/dL) | 107.8 ± 33.45 | 96.23 ± 28.89 | 0.237 | 105.3 ± 31.65 | 94.44 ± 27.8 | 0.220 |
| HDL cholesterol (mg/dL) | 52.13 ± 19.49 | 48.63 ± 10.9 | 0.377 | 53.6 ± 18.12 | 49.86 ± 14.87 | 0.480 |
| BUN (mg/dL) | 21.93 ± 10.5 | 19.33 ± 6.81 | 0.213 | 22.95 ± 15.43 | 21.44 ± 10.77 | 0.596 |
| Creatinine (mg/dL) | 0.89 ± 0.43 | 0.88 ± 0.37 | 0.969 | 1.12 ± 1.29 | 1.03 ± 0.72 | 0.735 |
| Creatinine Clearance (mL/min/1.73 m2) | 91.86 ± 38.5 | 90.16 ± 33.6 | 0.828 | 89.08 ± 37.99 | 84.85 ± 34.91 | 0.664 |
| AST (IU/L) | 23.7 ± 5.09 | 21.83 ± 6.81 | 0.194 | 22.84 ± 5.08 | 21.6 ± 6.19 | 0.206 |
| ALT (IU/L) | 16.43 ± 3.47 | 16.1 ± 5.31 | 0.796 | 17.14 ± 5.1 | 15.51 ± 5.41 | 0.157 |
| GGT (IU/L) | 23.03 ± 12 | 23 ± 8.55 | 0.987 | 29 ± 23.96 | 21.12 ± 8.37 | 0.094 |
| ALP (IU/L) | 80.87 ± 27.6 | 86.63 ± 22.98 | 0.362 | 83.95 ± 28.73 | 85.47 ± 22.27 | 0.532 |
| History of macrovascular complication | Hypertension (pair) | 5 | 20 | 1.000 | 7 | 29 | 1.000 |
| Dyslipidemia (pair) | 11 | 10 | 0.480 | 14 | 14 | 1.000 |
| Myocardial infarction (pair) | 0 | 0 | - | 0 | 0 | - |
| Angina (pair) | 3 | 0 | - | 4 | 0 | - |
| Heart failure (pair) | 0 | 0 | - | 1 | 0 | - |
| Atrial fibrillation (pair) | 0 | 0 | - | 2 | 0 | - |
| Any stroke (pair) | 2 | 1 | 0.683 | 3 | 1 | 1.000 |
| History of microvascular complication | Retinopathy (pair) | 2 | 14 | 0.010 | 3 | 21 | 0.002 |
| Glaucoma (pair) | 3 | 1 | 1.000 | 3 | 1 | 0.228 |
| Cataract (pair) | 6 | 11 | 1.000 | 9 | 15 | 1.000 |
| Chronic Kidney Disease (pair) | 5 | 1 | 1.000 | 7 | 3 | 1.000 |
| Peripheral neuropathy (pair) | 8 | 7 | 0.814 | 11 | 12 | 0.556 |
| Autonomic neuropathy (pair) | 6 | 5 | 1.000 | 6 | 6 | 0.789 |
| Current Medications | Metformin (pair) | 4 | 18 | 1.000 | 7 | 20 | 0.803 |
| Sulfonylurea (pair) | 7 | 11 | 0.773 | 13 | 12 | 0.383 |
| DPP-4 inhibitor (pair) | 8 | 2 | 0.579 | 10 | 3 | 0.628 |
| Meglitinide (pair) | 1 | 0 | 1.000 | 2 | 0 | 0.683 |
| Thiazolidinedione (pair) | 1 | 0 | 1.000 | 2 | 0 | 1.000 |
| SGLT-2 inhibitor (pair) | 0 | 0 | - | 0 | 0 | - |
| Alpha glucosidase inhibitor (pair) | 0 | 0 | - | 0 | 0 | - |
| Rapid acting insulin (pair) | 5 | 3 | 1.000 | 8 | 4 | 1.000 |
| Basal insulin (pair) | 9 | 5 | 1.000 | 13 | 8 | 0.677 |
| Pre-mixed insulin (pair) | 3 | 2 | 1.000 | 4 | 2 | 0.547 |
| GLP-1 agonist (pair) | 0 | 0 | - | 0 | 0 | - |
| Angiotensin Receptor Blocker (pair) | 8 | 9 | 0.789 | 11 | 12 | 0.480 |
| Angiotension Converting Enzyme inhibitor (pair) | 0 | 0 | 0.074 | 2 | 0 | 0.289 |
| Calcium channel blocker (pair) | 6 | 2 | 1.000 | 9 | 3 | 0.823 |
| Diuretics (pair) | 5 | 1 | 0.221 | 6 | 1 | 0.505 |
| Beta blocker (pair) | 4 | 1 | 0.683 | 6 | 3 | 0.289 |
| Statin (pair) | 10 | 8 | 1.000 | 12 | 12 | 1.000 |
| Fibrate (pair) | 1 | 0 | 1.000 | 1 | 0 | - |
| Aspirin (pair) | 5 | 1 | 1.000 | 8 | 2 | 0.387 |
| Clopidogrel (pair) | 4 | 0 | 0.683 | 6 | 0 | 0.752 |
| Cilostazol (pair) | 8 | 4 | 0.387 | 11 | 9 | 0.211 |

expressed as mean ± SD, or n (%).by Paired sample t-test, or McNemar’s test.

ME, macular edema; DM, diabetes mellitus; BMI, body mass index; LDL, Low density lipoprotein; HDL, high density lipoprotein; BUN, blood urea nitrogen; AST, aspartate aminotransferase; ALT, alanine aminotransferase; GGT, gamma-glutamyl transferase; ALP, alkaline phosphatase; CAG, coronary angiography; DPP, dipeptidylpeptidase; SGLT, sodium-glucose transporter.

**Table S2.** Plasma metabolites discriminating DME and non DME subjects based on metabolite profiling analyzed by GC-TOF-MS in discovery cohort.

| **No.** | **RT**  **(min)** | **Unique**  **Mass** | **Metabolites** | **AUC** | **Fold Change (DME/non-DME)** | **Mann-Whitney  U-test** |
| --- | --- | --- | --- | --- | --- | --- |
| 1 | 9.75 | 220 | Cysteine | 0.658 | 0.645 | 0.0385 |
| 2 | 10.23 | 246 | Glutamic acid | 0.762 | 0.653 | 0.0006 |
| 3 | 14.76 | 218 | Cystine | 0.733 | 0.666 | 0.0023 |
| 4 | 10.66 | 116 | Asparagine | 0.772 | 0.729 | 0.0004 |
| 5 | 9.45 | 232 | Aspartic acid | 0.715 | 0.782 | 0.0049 |
| 6 | 8.31 | 219 | Threonine | 0.670 | 0.819 | 0.0261 |
| 7 | 11.72 | 142 | Ornithine | 0.682 | 0.820 | 0.0173 |
| 8 | 9.51 | 156 | 5-Oxoproline | 0.676 | 0.826 | 0.0213 |
| 9 | 10.19 | 142 | Arginine | 0.620 | 0.842 | 0.1160 |
| 10 | 8.06 | 204 | Serine | 0.692 | 0.843 | 0.0122 |
| 11 | 12.45 | 174 | Lysine | 0.726 | 0.849 | 0.0031 |
| 12 | 11.12 | 156 | Glutamine | 0.621 | 0.857 | 0.1125 |
| 13 | 9.45 | 176 | Methionine | 0.602 | 0.878 | 0.1808 |
| 14 | 7.58 | 174 | Glycine | 0.664 | 0.880 | 0.0318 |
| 15 | 12.58 | 218 | Tyrosine | 0.536 | 0.941 | 0.6406 |
| 16 | 10.33 | 218 | Phenylalanine | 0.576 | 0.950 | 0.3193 |
| 17 | 5.56 | 116 | Alanine | 0.542 | 1.080 | 0.5860 |
| 18 | 7.50 | 142 | Proline | 0.524 | 1.098 | 0.7556 |
| 19 | 14.46 | 204 | Tryptophan | 0.562 | 1.245 | 0.4184 |
| 20 | 9.04 | 218 | Aminomalonic acid | 0.693 | 0.693 | 0.0117 |
| 21 | 13.64 | 441 | Uric acid | 0.786 | 0.707 | 0.0002 |
| 22 | 11.76 | 273 | Citric acid | 0.796 | 0.741 | 0.0001 |
| 23 | 9.18 | 233 | Malic acid | 0.688 | 0.749 | 0.0143 |
| 24 | 7.80 | 189 | Glyceric acid | 0.638 | 0.803 | 0.0711 |
| 25 | 12.64 | 333 | Galacturonic acid | 0.620 | 0.859 | 0.1160 |
| 26 | 5.05 | 174 | Pyruvic acid | 0.566 | 0.894 | 0.3878 |
| 27 | 5.29 | 177 | Glycolic acid | 0.590 | 0.914 | 0.2401 |
| 28 | 7.32 | 299 | Phosphoric acid | 0.519 | 1.049 | 0.8034 |
| 29 | 5.15 | 117 | Lactic acid | 0.562 | 1.059 | 0.4184 |
| 30 | 5.70 | 133 | Hydroxylamine | 0.640 | 1.155 | 0.0663 |
| 31 | 7.06 | 189 | Urea | 0.630 | 1.223 | 0.0898 |
| 32 | 9.79 | 115 | Creatinine | 0.652 | 1.239 | 0.0464 |
| 33 | 7.51 | 164 | Phenylacetic acid | 0.810 | 1.393 | 0.0001 |
| 34 | 16.12 | 91 | Docosahexaenoic acid | 0.600 | 0.805 | 0.1912 |
| 35 | 6.61 | 131 | 3-Hydroxyisovaleric acid | 0.528 | 0.929 | 0.7146 |
| 36 | 15.35 | 131 | Oleamide | 0.560 | 1.037 | 0.4366 |
| 37 | 17.07 | 397 | Monoolein | 0.518 | 1.039 | 0.8154 |
| 38 | 16.23 | 371 | Monopalmitin | 0.602 | 1.135 | 0.1808 |
| 39 | 8.01 | 215 | Nonanoic acid | 0.671 | 1.171 | 0.0255 |
| 40 | 8.86 | 229 | Decanoic acid | 0.691 | 1.192 | 0.0125 |
| 41 | 15.03 | 117 | Arachidonic acid | 0.530 | 1.424 | 0.6889 |
| 42 | 13.62 | 217 | myo-Inositol | 0.619 | 0.807 | 0.1197 |
| 43 | 7.25 | 117 | Glycerol | 0.592 | 0.911 | 0.2309 |
| 44 | 12.26 | 103 | Fructose | 0.588 | 0.918 | 0.2495 |
| 45 | 12.38 | 205 | Glucose | 0.520 | 0.999 | 0.7914 |
| 46 | 12.52 | 205 | Glucose | 0.520 | 1.022 | 0.4184 |
| 47 | 12.00 | 191 | 1,5-Anhydroglucitol | 0.531 | 1.028 | 0.6858 |
| 48 | 17.24 | 361 | Maltose | 0.612 | 1.188 | 0.1436 |
| 49 | 16.69 | 361 | Sucrose | 0.546 | 18.710 | 0.5491 |

**Table S3.** Plasma oxylipins identified in DME and non-DME subjects based on lipid profiling analyzed by HPLC-triple-Q-MS in discovery cohort.

| **No.** | **RT**  **(min)** | **Molecular**  **weight** | **Product ion (*m/z*)** | **Metabolites** | **AUC** | **Fold Change (DME/non-DME)** | **Mann-Whitney  U-test** |
| --- | --- | --- | --- | --- | --- | --- | --- |
| 50 | 7.11 | 320.5 | 275.3 | 20-HETE | 0.598 | 0.301 | 0.1742 |
| 51 | 3.96 | 352.5 | 315.25 | 15-keto Prostaglandin F2α | 0.750 | 0.341 | 0.0193 |
| 52 | 3.91 | 350.5 | 331.2 | 15-keto Prostaglandin E2 | 0.719 | 0.491 | 0.0354 |
| 53 | 3.35 | 370.5 | 195.2 | Thromboxane B2 | 0.598 | 0.643 | 0.3051 |
| 54 | 4.32 | 352.5 | 207.2 | 13,14-dihydro-15-keto Prostaglandin D2 | 0.617 | 0.746 | 0.2622 |
| 55 | 5.11 | 336.5 | 59.1 | 5(S)-HpETE | 0.624 | 0.752 | 0.2557 |
| 56 | 7.00 | 320.5 | 167.2 | (±) 11-HETE | 0.624 | 0.775 | 0.2563 |
| 57 | 7.24 | 320.5 | 155.15 | (±) 8 (9)-EET | 0.588 | 0.783 | 0.4150 |
| 58 | 7.07 | 320.5 | 179.2 | (±) 12-HETE | 0.579 | 0.804 | 0.4713 |
| 59 | 7.29 | 320.5 | 301.25 | (±) 5-HETE or (±) 8-HETE | 0.586 | 0.805 | 0.4321 |
| 60 | 4.94 | 336.5 | 317.3 | (±) 12-HpETE | 0.505 | 0.848 | 0.9652 |
| 61 | 3.74 | 625.8 | 189.15 | Leukotriene C4 | 0.505 | 0.853 | 0.9651 |
| 62 | 4.48 | 334.5 | 315.25 | Prostaglandin A2 | 0.526 | 0.878 | 0.8013 |
| 63 | 3.88 | 352.5 | 189.25 | Prostaglandin D2 | 0.586 | 0.915 | 0.4316 |
| 64 | 4.61 | 334.5 | 271.3 | Prostaglandin J2 | 0.524 | 0.991 | 0.8247 |
| 65 | 8.02 | 318.5 | 203.25 | 5-OxoETE | 0.548 | 1.041 | 0.6382 |
| 66 | 4.94 | 338.5 | 319.3 | (±) 11(12)-DiHET or (±) 14 (15)-DiHET | 0.557 | 1.060 | 0.6004 |
| 67 | 7.14 | 320.5 | 163.3 | (±) 5(6)-EET | 0.574 | 1.115 | 0.4970 |
| 68 | 3.64 | 332.5 | 315.15 | Leukotriene A4 methyl ester | 0.519 | 1.140 | 0.8614 |
| 69 | 4.08 | 496.7 | 177.1 | Leukotriene D4 | 0.605 | 1.203 | 0.3354 |
| 70 | 5.17 | 336.5 | 195.2 | Leukotriene B4 | 0.562 | 1.220 | 0.5699 |
| 71 | 6.81 | 320.5 | 219.2 | (±) 15-HETE | 0.655 | 1.274 | 0.1555 |
| 72 | 7.24 | 318.5 | 113.1 | 15-OxoETE | 0.812 | 1.319 | 0.0042 |
| 73 | 7.28 | 320.5 | 151.2 | (±) 9-HETE | 0.602 | 1.373 | 0.3430 |
| 74 | 4.50 | 334.5 | 235.15 | Prostaglandin B2 | 0.595 | 1.453 | 0.3470 |
| 75 | 3.99 | 352.5 | 271.3 | Prostaglandin E2 or Prostaglandin H2 | 0.648 | 1.463 | 0.1605 |
| 76 | 7.28 | 320.5 | 257.25 | (±) 11(12)-EET or (±) 14(15)-EET | 0.686 | 1.465 | 0.0886 |
| 77 | 4.01 | 352.5 | 333.25 | 20-hydroxy Leukotriene B4 | 0.602 | 1.479 | 0.3193 |
| 78 | 6.07 | 318.5 | 299.85 | 12-OxoETE | 0.867 | 1.526 | 0.0008 |
| 79 | 3.38 | 368.5 | 349.25 | 11-dehydro Thromboxane B2 | 0.538 | 1.578 | 0.6961 |
| 80 | 4.50 | 354.5 | 113.1 | 13,14-dihydro-15-keto Prostaglandin F2α | 0.571 | 2.816 | 0.3833 |
| 81 | 3.98 | 352.5 | 221.25 | Lipoxin B4 | 0.586 | 4.364 | 0.2673 |
| 82 | 3.02 | 366.5 | 347.25 | 20-carboxy Leukotriene B4 | 0.743 | 5.575 | 0.0128 |
| 83 | 3.72 | 354.5 | 309.25 | Prostaglandin F2α | 0.543 | 6.221 | 0.4575 |
| 84 | 3.25 | 370.5 | 163.2 | 6-keto Prostaglandin F1α | 0.536 | 13657142858.071 | 0.3006 |
| 85 | 4.88 | 336.5 | 273.25 | 15 (S)-HpETE | 0.607 | 22557142857.929 | 0.0633 |
| 86 | 7.65 | 344.5 | 101.05 | (±) 4-HDHA | 0.690 | 0.757 | 0.0804 |
| 87 | 7.16 | 344.5 | 325.25 | (±)2 0-HDHA | 0.669 | 0.769 | 0.1213 |
| 88 | 7.39 | 344.5 | 141.15 | (±) 7-HDHA | 0.524 | 0.895 | 0.6454 |
| 89 | 7.38 | 344.5 | 189.25 | (±) 8-HDHA | 0.650 | 0.908 | 0.1689 |
| 90 | 7.06 | 344.5 | 245.25 | (±) 17-HDHA | 0.531 | 0.923 | 0.9652 |
| 91 | 7.06 | 344.5 | 233.25 | (±) 16-HDHA | 0.595 | 0.939 | 0.3826 |
| 92 | 5.01 | 360.5 | 153.2 | 10(S),17(S)-DiHDHA | 0.558 | 0.966 | 0.4029 |
| 93 | 7.24 | 344.5 | 153.15 | (±) 10-HDHA | 0.505 | 1.130 | 0.9652 |
| 94 | 7.22 | 344.5 | 281.25 | (±) 13-HDHA | 0.538 | 1.187 | 0.7270 |
| 95 | 6.40 | 318.5 | 219.2 | (±) 15-HEPE | 0.617 | 0.812 | 0.2839 |
| 96 | 6.60 | 318.5 | 255.3 | (±) 11(12)-EpETE | 0.633 | 0.887 | 0.2217 |
| 97 | 6.54 | 318.5 | 179.2 | (±) 12-HEPE | 0.550 | 0.891 | 0.6466 |
| 98 | 3.88 | 350.5 | 233.2 | Prostaglandin D3 | 0.634 | 0.898 | 0.9458 |
| 99 | 6.52 | 318.5 | 299.25 | (±) 18-HEPE | 0.567 | 0.924 | 0.5412 |
| 100 | 3.77 | 350.5 | 269.25 | Prostaglandin E3 | 0.518 | 1.417 | 0.4249 |
| 101 | 7.53 | 294.4 | 185.2 | 9-OxoODE | 0.755 | 0.692 | 0.0195 |
| 102 | 7.26 | 294.4 | 113.15 | 13-OxoODE | 0.617 | 0.480 | 0.4850 |
| 103 | 5.18 | 314.5 | 183.25 | (±) 12(13)-DiHOME | 0.643 | 0.822 | 0.1904 |
| 104 | 6.88 | 296.5 | 277.4 | (±) 9(10)-EpOME | 0.624 | 0.838 | 0.2565 |
| 105 | 5.30 | 314.5 | 201.2 | (±) 9(10)-DiHOME | 0.586 | 0.914 | 0.4321 |
| 106 | 7.76 | 296.5 | 301.05 | (±) 9-HODE or (±) 13-HODE | 0.743 | 0.924 | 0.0260 |
| 107 | 6.15 | 294.4 | 275.25 | 9(S)-HOTrE | 0.610 | 0.931 | 0.3155 |
| 108 | 6.60 | 312.4 | 183.1 | 13(S)-HpODE | 0.548 | 1.037 | 0.6625 |
| 109 | 6.56 | 312.4 | 220.1 | 9(S)-HpODE | 0.567 | 1.067 | 0.5412 |

**Table S4.** Plasma metabolites discriminating DME and non DME subjects based on metabolite profiling analyzed by GC-TOF-MS in extended cohort.

| **No.** | **RT**  **(min)** | **Unique**  **Mass** | **Metabolites** | **AUC** | **Fold Change (DME/non-DME)** | **Mann-Whitney  U-test** |
| --- | --- | --- | --- | --- | --- | --- |
| 110 | 10.23 | 246 | Glutamic acid | 0.733 | 0.671 | 0.0003 |
| 111 | 14.76 | 218 | Cystine | 0.665 | 0.732 | 0.0097 |
| 112 | 5.56 | 116 | Alanine | 0.526 | 0.777 | 0.6852 |
| 113 | 9.75 | 220 | Cysteine | 0.566 | 0.790 | 0.3034 |
| 114 | 9.45 | 232 | Aspartic acid | 0.676 | 0.814 | 0.0058 |
| 115 | 10.66 | 116 | Asparagine | 0.666 | 0.821 | 0.0093 |
| 116 | 11.12 | 156 | Glutamine | 0.643 | 0.834 | 0.0250 |
| 117 | 12.45 | 174 | Lysine | 0.686 | 0.864 | 0.0035 |
| 118 | 9.45 | 176 | Methionine | 0.588 | 0.883 | 0.1662 |
| 119 | 8.31 | 219 | Threonine | 0.600 | 0.887 | 0.1151 |
| 120 | 8.06 | 204 | Serine | 0.624 | 0.898 | 0.0513 |
| 121 | 12.58 | 218 | Tyrosine | 0.584 | 0.910 | 0.1897 |
| 122 | 11.72 | 142 | Ornithine | 0.587 | 0.913 | 0.1747 |
| 123 | 5.41 | 72 | Valine | 0.570 | 0.928 | 0.2744 |
| 124 | 10.33 | 218 | Phenylalanine | 0.592 | 0.940 | 0.1476 |
| 125 | 7.45 | 158 | Isoleucine | 0.556 | 1.047 | 0.3770 |
| 126 | 7.50 | 142 | Proline | 0.536 | 1.092 | 0.5723 |
| 127 | 12.64 | 333 | Galacturonic acid | 0.556 | 0.734 | 0.3819 |
| 128 | 13.64 | 441 | Uric acid | 0.738 | 0.757 | 0.0002 |
| 129 | 9.18 | 233 | Malic acid | 0.641 | 0.805 | 0.0266 |
| 130 | 11.76 | 273 | Citric acid | 0.684 | 0.835 | 0.0039 |
| 131 | 9.04 | 218 | Aminomalonic acid | 0.600 | 0.839 | 0.1172 |
| 132 | 5.05 | 174 | Pyruvic acid | 0.573 | 0.885 | 0.2530 |
| 133 | 7.80 | 189 | Glyceric acid | 0.615 | 0.906 | 0.0713 |
| 134 | 5.29 | 177 | Hydroxyacetic acid | 0.580 | 0.929 | 0.2121 |
| 135 | 7.32 | 299 | Phosphoric acid | 0.524 | 1.059 | 0.7088 |
| 136 | 5.70 | 133 | Hydroxylamine | 0.571 | 1.080 | 0.2626 |
| 137 | 7.06 | 189 | Urea | 0.621 | 1.210 | 0.0574 |
| 138 | 7.51 | 164 | Benzeneacetic acid | 0.719 | 1.291 | 0.0006 |
| 139 | 9.79 | 115 | Creatinine | 0.652 | 1.362 | 0.0170 |
| 140 | 6.12 | 191 | 3-Hydroxyisobutyric acid | 0.559 | 0.797 | 0.3576 |
| 141 | 13.03 | 311 | Palmitoleic acid | 0.620 | 0.806 | 0.0606 |
| 142 | 16.12 | 91 | Docosahexaenoic acid | 0.607 | 0.807 | 0.0938 |
| 143 | 14.20 | 339 | Oleic acid | 0.569 | 0.887 | 0.2784 |
| 144 | 14.18 | 337 | Linoleic acid | 0.551 | 0.905 | 0.4228 |
| 145 | 13.15 | 313 | Palmitic acid | 0.580 | 0.924 | 0.2121 |
| 146 | 15.35 | 131 | Oleamide | 0.543 | 1.042 | 0.5003 |
| 147 | 16.23 | 371 | Monopalmitin | 0.529 | 1.057 | 0.6488 |
| 148 | 8.86 | 229 | Decanoic acid | 0.615 | 1.124 | 0.0720 |
| 149 | 8.01 | 215 | Nonanoic acid | 0.639 | 1.140 | 0.0291 |
| 150 | 13.62 | 217 | myo-Inositol | 0.536 | 0.849 | 0.5723 |
| 151 | 7.25 | 117 | Glycerol | 0.562 | 0.930 | 0.3343 |
| 152 | 17.24 | 361 | Maltose | 0.593 | 1.160 | 0.1425 |
| 153 | 16.69 | 361 | Sucrose | 0.558 | 12.596 | 0.3624 |

**Table S5.** Plasma oxylipins identified in DME and non-DME subjects based on lipid profiling analyzed by HPLC-triple-Q-MS in extended cohort.

| **No.** | **RT**  **(min)** | **Molecular**  **weight** | **Product ion (*m/z*)** | **Metabolites** | **AUC** | **Fold Change (DME/non-DME)** | **Mann-Whitney  U-test** |
| --- | --- | --- | --- | --- | --- | --- | --- |
| 154 | 7.11 | 320.5 | 275.3 | 20-HETE | 0.639 | 0.090 | 0.0220 |
| 155 | 3.91 | 350.5 | 331.2 | 15-keto Prostaglandin E2 | 0.632 | 0.597 | 0.1073 |
| 156 | 7.29 | 320.5 | 301.25 | (±)5-HETE or (±)8-HETE | 0.654 | 0.645 | 0.0845 |
| 157 | 7.07 | 320.5 | 179.2 | (±)12-HETE | 0.631 | 0.674 | 0.1415 |
| 158 | 3.96 | 352.5 | 315.25 | 15-keto Prostaglandin F2α | 0.584 | 0.727 | 0.3250 |
| 159 | 8.02 | 318.5 | 203.25 | 5-OxoETE | 0.517 | 0.793 | 0.8327 |
| 160 | 7.14 | 320.5 | 163.3 | (±)5(6)-EET | 0.539 | 0.793 | 0.6610 |
| 161 | 3.72 | 354.5 | 309.25 | Prostaglandin F2α | 0.500 | 0.794 | 1.0000 |
| 162 | 4.08 | 496.7 | 177.1 | Leukotriene D4 | 0.510 | 0.804 | 0.9126 |
| 163 | 7.24 | 320.5 | 155.15 | (±)8(9)-EET | 0.527 | 0.851 | 0.7593 |
| 164 | 4.32 | 352.5 | 207.2 | 13,14-dihydro-15-keto Prostaglandin D2 | 0.570 | 0.857 | 0.4086 |
| 165 | 4.01 | 352.5 | 333.25 | 20-hydroxy Leukotriene B4 | 0.526 | 0.899 | 0.7585 |
| 166 | 7.00 | 320.5 | 167.2 | (±)11-HETE | 0.549 | 0.936 | 0.5845 |
| 167 | 4.94 | 336.5 | 317.3 | (±)12-HpETE | 0.501 | 0.939 | 0.9903 |
| 168 | 6.81 | 320.5 | 219.2 | (±)15-HETE | 0.509 | 0.971 | 0.9225 |
| 169 | 3.88 | 352.5 | 189.25 | Prostaglandin D2 | 0.552 | 0.971 | 0.5596 |
| 170 | 5.11 | 336.5 | 59.1 | 5(S)-HpETE | 0.587 | 0.981 | 0.3307 |
| 171 | 3.74 | 625.8 | 189.15 | Leukotriene C4 | 0.532 | 0.984 | 0.7149 |
| 172 | 7.28 | 320.5 | 257.25 | (±)11(12)-EET or (±)14(15)-EET | 0.553 | 1.014 | 0.5516 |
| 173 | 3.35 | 370.5 | 195.2 | Thromboxane B2 | 0.512 | 1.019 | 0.8858 |
| 174 | 3.25 | 370.5 | 163.2 | 6-keto Prostaglandin F1α | 0.521 | 1.023 | 0.7196 |
| 175 | 3.64 | 332.5 | 315.15 | Leukotriene A4 methyl ester | 0.530 | 1.041 | 0.7337 |
| 176 | 7.28 | 320.5 | 151.2 | (±)9-HETE | 0.524 | 1.189 | 0.7876 |
| 177 | 7.24 | 318.5 | 113.1 | 15-OxoETE | 0.715 | 1.282 | 0.0156 |
| 178 | 4.50 | 334.5 | 235.15 | Prostaglandin B2 | 0.565 | 1.312 | 0.4161 |
| 179 | 4.94 | 338.5 | 319.3 | (±)11(12)-DiHET or (±)14(15)-DiHET | 0.564 | 1.329 | 0.4735 |
| 180 | 6.07 | 318.5 | 299.85 | 12-OxoETE | 0.784 | 1.340 | 0.0015 |
| 181 | 4.48 | 334.5 | 315.25 | Prostaglandin A2 | 0.542 | 1.361 | 0.6248 |
| 182 | 5.17 | 336.5 | 195.2 | Leukotriene B4 | 0.564 | 1.399 | 0.4731 |
| 183 | 4.61 | 334.5 | 271.3 | Prostaglandin J2 | 0.590 | 1.414 | 0.3065 |
| 184 | 3.38 | 368.5 | 349.25 | 11-dehydro Thromboxane B2 | 0.554 | 1.563 | 0.4914 |
| 185 | 3.99 | 352.5 | 271.3 | Prostaglandin E2 or Prostaglandin H2 | 0.656 | 1.792 | 0.0692 |
| 186 | 4.50 | 354.5 | 113.1 | 13,14-dihydro-15-keto Prostaglandin F2α | 0.574 | 2.303 | 0.2645 |
| 187 | 3.98 | 352.5 | 221.25 | Lipoxin B4 | 0.554 | 2.311 | 0.3709 |
| 188 | 3.02 | 366.5 | 347.25 | 20-carboxy Leukotriene B4 | 0.755 | 5.198 | 0.0014 |
| 189 | 4.88 | 336.5 | 273.25 | 15(S)-HpETE | 0.571 | 15038095238.952 | 0.0695 |
| 190 | 7.39 | 344.5 | 141.15 | (±)7-HDHA | 0.549 | 0.786 | 0.5828 |
| 191 | 7.16 | 344.5 | 325.25 | (±)20-HDHA | 0.609 | 0.819 | 0.2198 |
| 192 | 7.38 | 344.5 | 189.25 | (±)8-HDHA | 0.618 | 0.823 | 0.1854 |
| 193 | 7.65 | 344.5 | 101.05 | (±)4-HDHA | 0.637 | 0.832 | 0.1225 |
| 194 | 7.06 | 344.5 | 233.25 | (±)16-HDHA | 0.577 | 0.878 | 0.3882 |
| 195 | 7.06 | 344.5 | 245.25 | (±)17-HDHA | 0.524 | 0.936 | 0.7890 |
| 196 | 7.24 | 344.5 | 153.15 | (±)10-HDHA | 0.514 | 1.012 | 0.8745 |
| 197 | 7.22 | 344.5 | 281.25 | (±)13-HDHA | 0.537 | 1.022 | 0.6796 |
| 198 | 5.01 | 360.5 | 153.2 | 10(S),17(S)-DiHDHA | 0.526 | 1.249 | 0.7657 |
| 199 | 6.54 | 318.5 | 179.2 | (±)12-HEPE | 0.608 | 0.736 | 0.2243 |
| 200 | 6.40 | 318.5 | 219.2 | (±)15-HEPE | 0.642 | 0.768 | 0.1112 |
| 201 | 6.52 | 318.5 | 299.25 | (±)18-HEPE | 0.587 | 0.893 | 0.3311 |
| 202 | 6.60 | 318.5 | 255.3 | (±)11(12)-EpETE | 0.591 | 0.906 | 0.3018 |
| 203 | 3.88 | 350.5 | 233.2 | Prostaglandin D3 | 0.541 | 1.609 | 0.6065 |
| 204 | 3.77 | 350.5 | 269.25 | Prostaglandin E3 | 0.548 | 1.709 | 0.5811 |
| 205 | 7.53 | 294.4 | 185.2 | 9-OxoODE | 0.711 | 0.677 | 0.0178 |
| 206 | 7.26 | 294.4 | 113.15 | 13-OxoODE | 0.607 | 0.583 | 0.2291 |
| 207 | 5.18 | 314.5 | 183.25 | (±)12(13)-DiHOME | 0.600 | 0.868 | 0.2637 |
| 208 | 5.30 | 314.5 | 201.2 | (±)9(10)-DiHOME | 0.600 | 0.872 | 0.2637 |
| 209 | 6.88 | 296.5 | 277.4 | (±)9(10)-EpOME | 0.558 | 0.908 | 0.5118 |
| 210 | 7.76 | 296.5 | 301.05 | (±)9-HODE or (±)13-HODE | 0.511 | 1.011 | 0.9033 |
| 211 | 6.15 | 294.4 | 275.25 | 9(S)-HOTrE | 0.587 | 1.023 | 0.3311 |
| 212 | 6.56 | 312.4 | 220.1 | 9(S)-HpODE | 0.526 | 1.090 | 0.7706 |
| 213 | 6.60 | 312.4 | 183.1 | 13(S)-HpODE | 0.623 | 1.100 | 0.1661 |

**Supplementary Figures**

**Figure S1.** Principal component analysis (PCA) (A) and orthogonal partial least squares discriminant analysis (OPLS-DA) (B) score plots for plasma of DME and non-DME subjects analyzed by GC-TOF-MS in discovery cohort. ●―DME group, ●―non-DME group


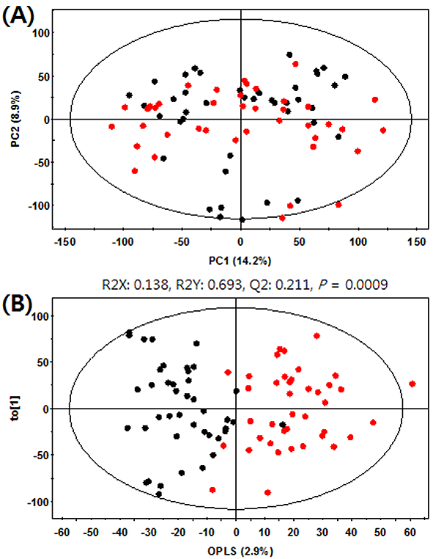


**Figure S2.** Heat maps representing relative levels of metabolites between diabetic macular edema (DME) and non-DME subjects in discovery cohorts (A) and extended cohorts (B). *Left*―metabolites were selected based on VIP value (> 0.7) derived from PLS-DA analyzed by GC-TOF-MS. *Right*―metabolites derived from lipid profiling analyzed by HPLC-triple-Q-MS analysis. Asterisks indicate statistically significant metabolite differences between DME and non-DME groups (*p* < 0.05).


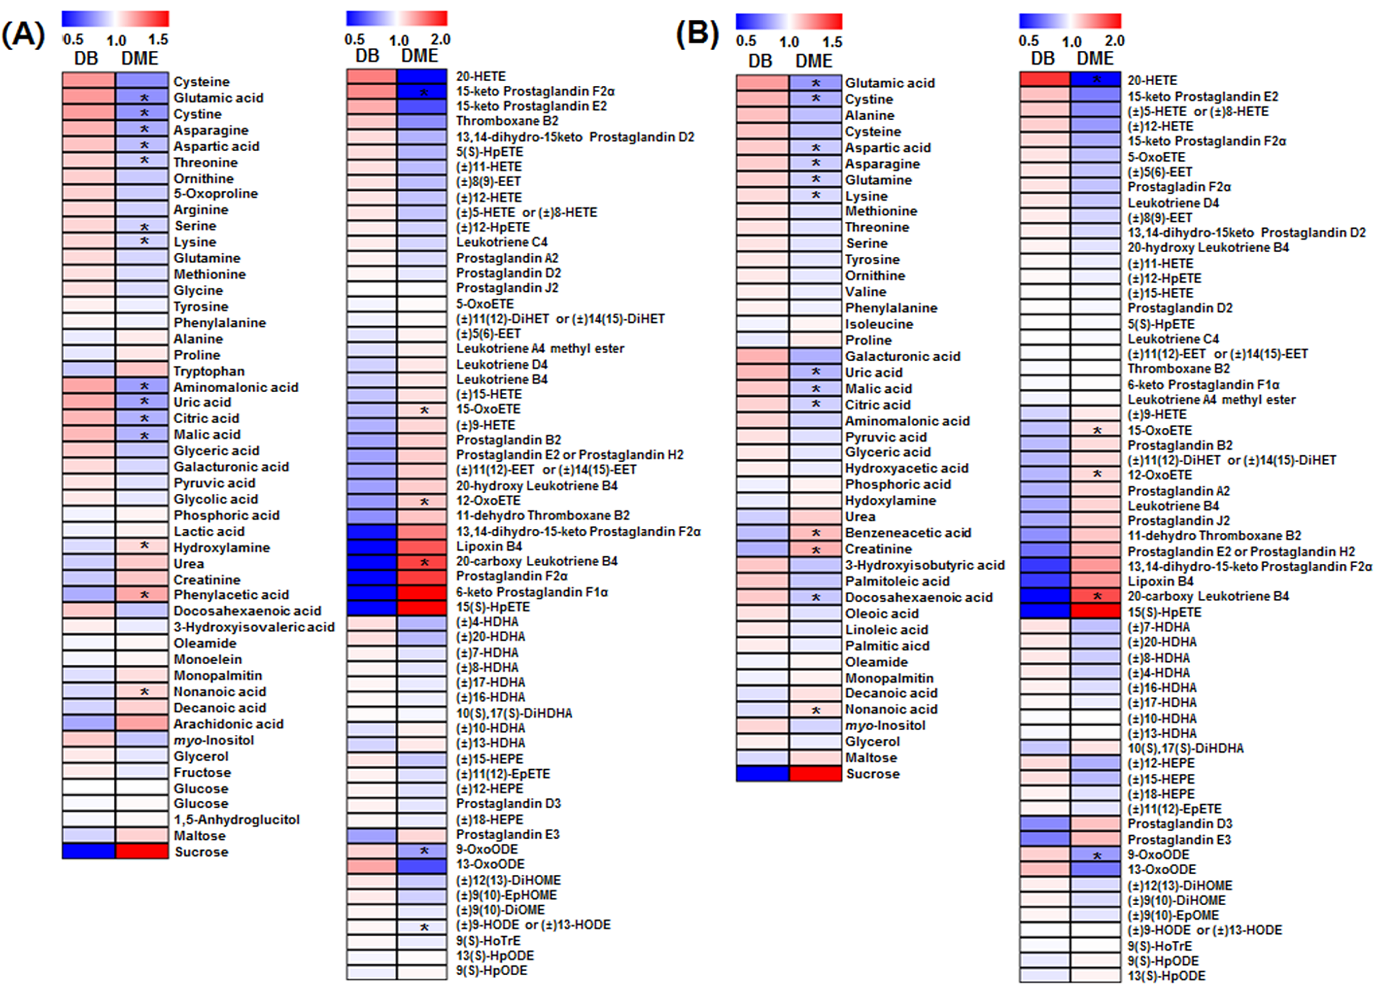


**Figure S3.** Combined receiver operating characteristic (ROC) curve of potential metabolite biomarkers distinguishing diabetic macular edema (DME) versus non-DME subjects in extended cohort. (A) identical 7 metabolites as selected in discovery cohort after GC-TOF-MS analysis-based metabolite profiling. (B) identical 4 oxylipins as selected in discovery cohort after lipid profiling analyzed by HPLC-triple-Q-MS. The combined ROC curves were overlain on single plots. The AUC values are shown inside the ROC curve.


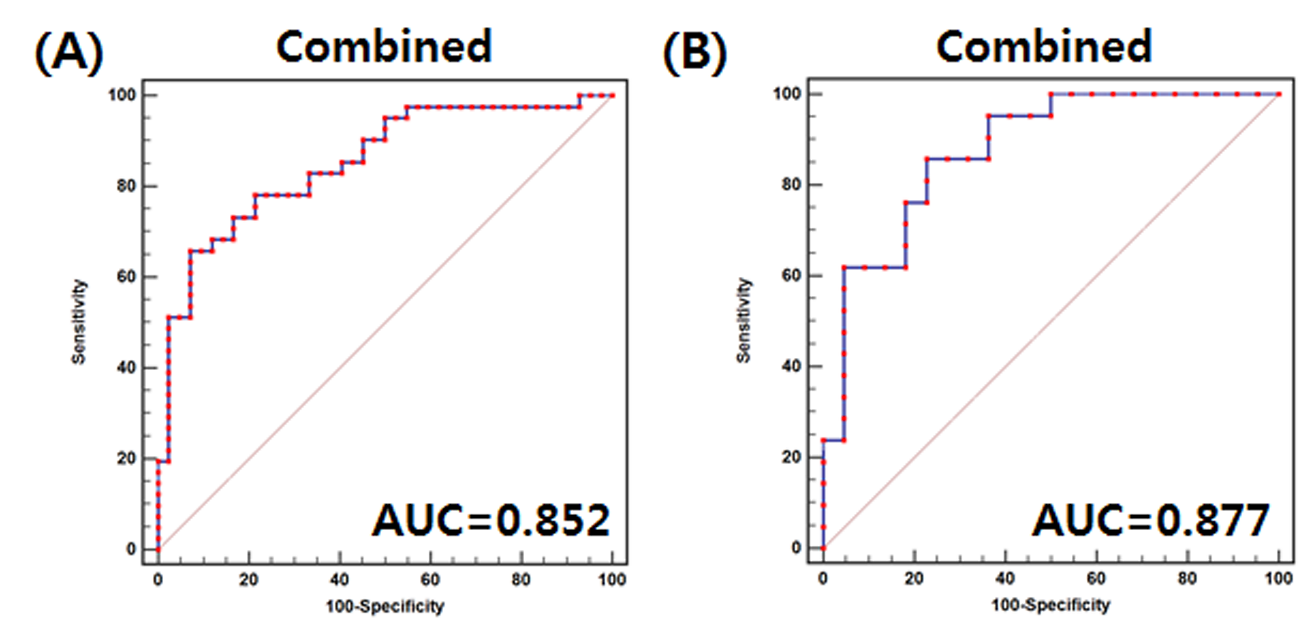

Supplement: Supplementary file 1 [file 8080db6bc963f7613ab542ae.docx]
